# Supplementary material for: Establishment of Highly Transplantable Cholangiocarcinoma Cell Lines from a Patient-Derived Xenograft Mouse Model
Source: PubMed Central journal article supplement (PMC6562875; doi:10.3390/cells8050496), 2019-05-23
Supplement: cells-08-00496-s001.pdf [file cells-08-00496-s001.pdf]

Article

# Establishment of highly Transplantable Cholangiocarcinoma Cell Lines from Patient Derived Xenograft Mouse Model

**Table 1.** Primers for CCA cell line characterization.

| Genes       | Primer sequence (5'→3')            |                                    | Products (bp) |
|-------------|------------------------------------|------------------------------------|---------------|
|             | Sense                              | Antisense                          |               |
| <i>AFP</i>  | TTTTGGGACCCGAACCTTCC               | CTCCTGGTATCCTTTAGCAACTCT           | 451           |
| <i>ALB</i>  | GGTGTGATTGCCTTTGCTC                | CCCTTCATCCC GAAGTTCAT              | 502           |
| <i>CK7</i>  | CCCTCAATGAGACGGAGTTG               | GTAGGTGGCGATCTCGATGT               | 497           |
| <i>CK19</i> | TCCCGCGACTACAGCCACTAC<br>TACACGACC | CGCGACTTGATGTCCATGAGCC<br>GCTGGTAC | 746           |
| <i>GGT</i>  | ACAACAGCACCACACGAAAA               | TCAGCTCAGCACGGTAGTTG               | 501           |
| <i>αSMA</i> | CTTCAGCTTTCAGCTTCCCTGA             | TTGCTCTGTGCTTCGTCACC               | 274           |

**Table 2.** Durations of the F0 tumor developments, patient survival times, percent of CK19 positive area and percent of Ki-67 positive nuclei.

| Code | Survival* (days) | Duration** (days) | %CK19 | %Ki-67 |
|------|------------------|-------------------|-------|--------|
| D049 | 257              | 58                | 27    | 40     |
| D058 | 105              | 123               | 17    | 30     |
| D068 | 212              | 28                | 37    | 5      |
| D070 | 208              | 144               | 46    | 10     |
| D078 | 193              | 163               | 2     | 10     |
| D088 | 165              | 106               | 39    | 5      |
| D090 | 161              | 163               | 39    | 0.1    |
| D096 | 144              | 39                | 19    | 0.1    |
| D113 | 94               | 152               | 25    | 0      |
| D119 | 71               | 194               | 15    | 5      |
| D131 | 31               | 47                | 63    | 10     |
| D138 | 23               | 111               | 32    | 5      |

\*Survival was calculated from the surgery to death; \*\*Duration was calculated from implantation to removal.

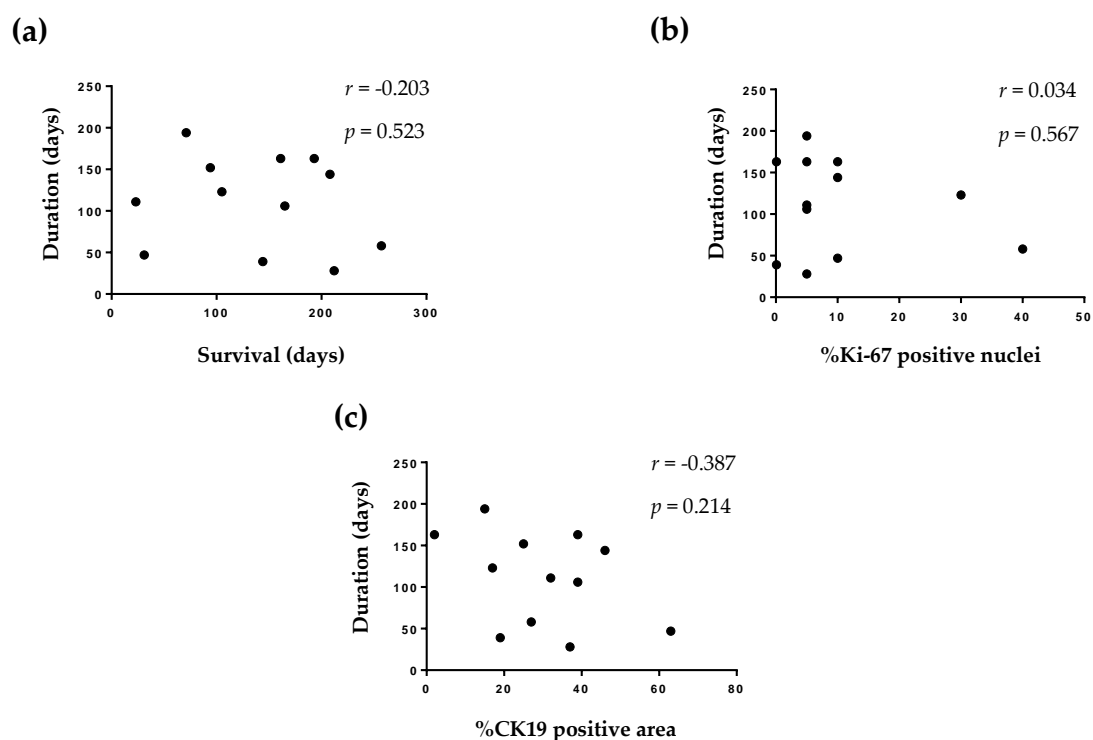

**Figure 1.** The correlation of the F0 tumor development and patient survival, percentage of Ki-67 positive nuclei and percentage of CK19 positive area.

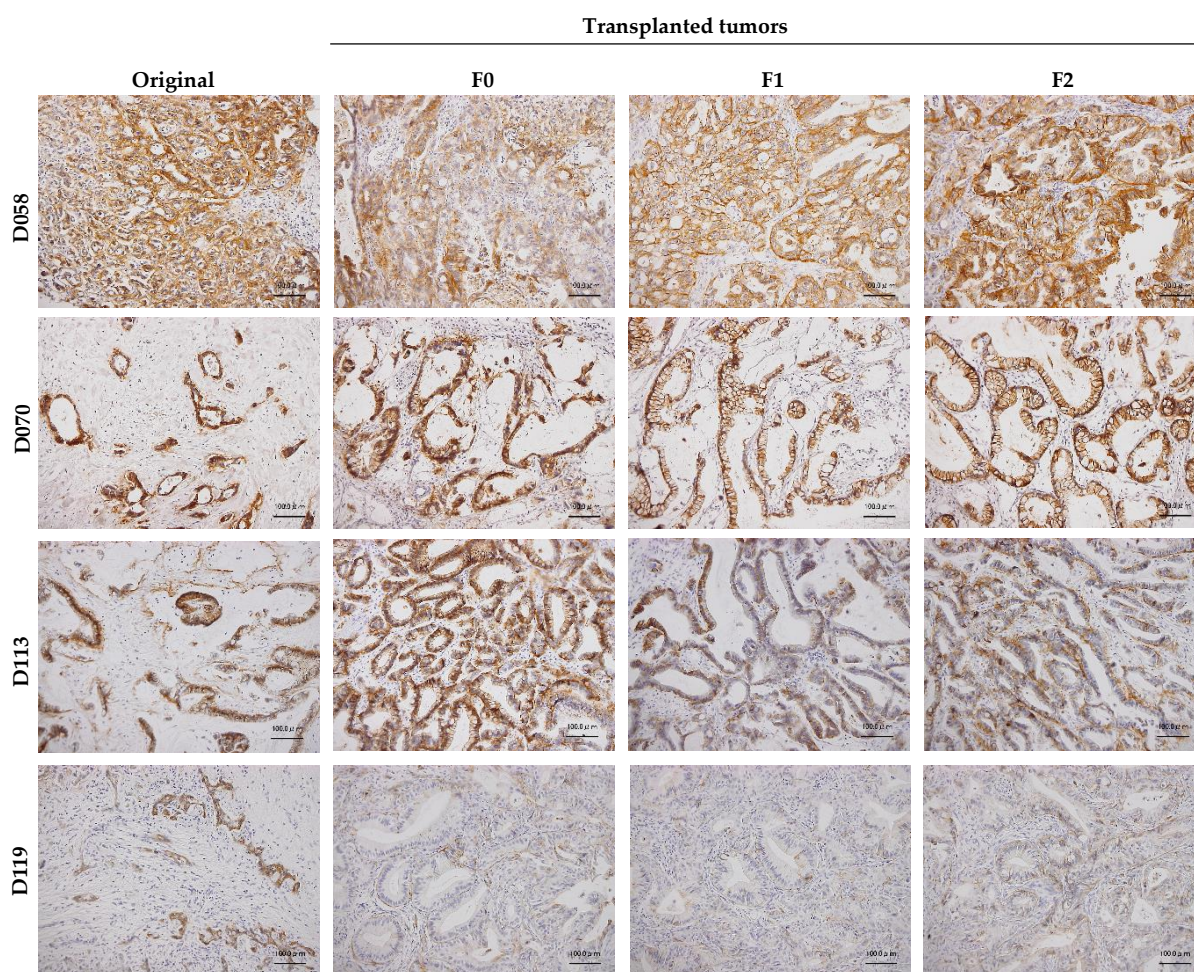

**Figure 2.** Comparison of EpCAM expressions between original tumor tissues from patient (original) and serially transplanted tissues (F0, F1 and F2). Bar = 100  $\mu$ m.
